# Supplementary material
Source: publisher site journal article supplement (https://www.dovepress.com/article/578660)
Supplement: Supplementary file 1 [file 578660%20Supplementary%20Appendix%201-2.docx]

**Appendix 1: Survey Instrument**

**Study Title:** Public Perceptions of Ethical and Professional Practice in Jordanian Community Pharmacies

**Study Information**

**Aim:**
This study aims to investigate gaps in effective and ethical pharmaceutical care in Jordanian community pharmacies.

**Eligibility:**
You must be 18 years or older and have visited a community pharmacy within the last two weeks.

**Risks and Benefits:**
There are no direct benefits or known risks from participation. Results may help improve pharmacy practice in Jordan.

**Confidentiality:**
No identifying information will be collected. Data will be used for research purposes only.

**Voluntary Participation:**
Participation is voluntary. You may withdraw at any time.

**Ethical Approval:**
Approved by the Institutional Review Board of Jordan University of Science and Technology.

**Informed Consent**
☐ I have read and understood the information provided about the study. I understand that my participation is totally voluntary with no compensation, and I have the right to withdraw at any time without justifying that. I voluntarily agree to take part in this study and to complete it only once. I was informed that the results will be published in a scientific journal without identifying information.

**Section 1: Demographic and Health Information**

**1. Gender**
☐ Female ☐ Male

**2. Age:** ____________ years

**3. Region of residence**
☐ North of Jordan ☐ Middle of Jordan ☐ South of Jordan

**4. Education level**
☐ Less than high school ☐ High school ☐ Diploma
☐ Bachelor’s degree ☐ Master’s/PhD degree

**5. Monthly income**
☐ Less than 650 JD ☐ 650–1300 JD ☐ More than 1300 JD

**6. Smoking status (cigarettes, waterpipe, or e-cigarette)**
☐ Yes ☐ No

**7. Do you have any of the following chronic conditions?**

| **Condition** | **Yes** | **No** |
| --- | --- | --- |
| Hypertension |  |  |
| Diabetes Mellitus |  |  |
| Cardiovascular diseases |  |  |
| Thyroid disorders |  |  |
| Bone or joint diseases |  |  |

**8. Are you currently pregnant or breastfeeding? (Females only)**
☐ Yes ☐ No ☐ Not applicable

**9. Do you work in the medical field (doctor, dentist, nurse, pharmacist, clinical pharmacist, lab technician)?**
☐ Yes ☐ No

**10. Do you have first-degree relatives living with you who work in the medical field?**
☐ Yes ☐ No

**Section 2: Patient Satisfaction and Counseling Quality**

Please answer about your most recent pharmacy visit.

**A. Patient History Taking**

| **Question** | **Yes** | **No** |
| --- | --- | --- |
| The pharmacist asked about my history of chronic diseases |  |  |
| The pharmacist asked about food or drug allergies |  |  |
| The pharmacist asked about current medications, herbs, or supplements |  |  |
| The pharmacist asked about my smoking status |  |  |
| The pharmacist asked about alcohol use |  |  |
| The pharmacist asked about pregnancy or breastfeeding (if applicable) |  |  |

**B. Patient Counseling**

| **Question** | **Yes** | **No** |
| --- | --- | --- |
| The pharmacist explained the indication of the medication |  |  |
| The pharmacist explained how to take the medication in relation to meals |  |  |
| The pharmacist explained the most appropriate time to take the medication |  |  |
| The pharmacist explained the duration of medication use |  |  |
| The pharmacist informed me about possible adverse drug effects |  |  |
| The pharmacist informed me about possible drug or food interactions |  |  |
| The pharmacist explained proper storage conditions for the medication |  |  |

**C. Counseling About Medical Devices**

| **Question** | **Yes** | **No** | **Not applicable** |
| --- | --- | --- | --- |
| The pharmacist explained how to use medical devices (e.g., inhalers, pens, nebulizers, sprays) when I purchased them |  |  |  |

**Section 3: Ethical and Professional Practices**

**A. Privacy**

| **Question** | **Yes** | **No** |
| --- | --- | --- |
| There was a private area in the pharmacy for counseling |  |  |
| The pharmacist discussed sensitive information in front of others |  |  |
| The pharmacist shared my private information without permission |  |  |

**B. Autonomy and Right to Choose**

| **Question** | **Yes** | **No** | **Not applicable** |
| --- | --- | --- | --- |
| The pharmacist asked for my consent before dispensing an alternative medication |  |  |  |
| The pharmacist asked for my consent before dispensing a medication approaching its expiration date |  |  |  |

**C. Justice and Fair Treatment**

| **Question** | **Yes** | **No** |
| --- | --- | --- |
| The pharmacist gave me fair time compared to other patients |  |  |
| The pharmacist committed to my order appropriately |  |  |
| The pharmacist treated me fairly compared to others |  |  |
| The pharmacist provided equal education compared to other patients |  |  |

**Section 4: Your Attitudes Toward Pharmacists**

Please select one option for each statement:

| **Statement** | **Strongly agree** | **Agree** | **Neutral** | **Disagree** | **Strongly disagree** |
| --- | --- | --- | --- | --- | --- |
| Pharmacists are healthcare providers with detailed medication knowledge |  |  |  |  |  |
| Pharmacists are only sellers of medications and lack sufficient knowledge |  |  |  |  |  |
| If I have a question about a medication, the pharmacist is the right person to ask |  |  |  |  |  |
| Jordanian pharmacists need further training in patient education |  |  |  |  |  |
| I trust the information I receive from pharmacists |  |  |  |  |  |
| Pharmacist counseling helps me adhere to my medications |  |  |  |  |  |

## **Appendix 2. Patients’ Satisfaction**

1. **Patients’ History**

**Table A1:** Patients’ satisfaction about pharmacists’ role in taking patients’ history.

| **Question** | **Number (%)** | |
| --- | --- | --- |
| **Yes** | **No** |
| The pharmacist has asked about the history of chronic diseases | 485 (68.3%) | 225 (31.7%) |
| The pharmacist has asked about any food or drug allergy | 510 (71.8%) | 200 (28.2%) |
| The pharmacist has asked about the current use of any medications, herbs, or supplements | 311 (43.8%) | 399 (56.2%) |
| The pharmacist has asked about the smoking status | 370 (52.1%) | 340 (47.9%) |
| The pharmacist has asked about current alcohol use | 195 (27.5%) | 515 (72.5%) |
| The pharmacist has asked about pregnancy or breastfeeding (For females) | 314 (44.2%) | 396 (55.8%) |

1. **Patients Counselling**

**Table A2**: Patients’ satisfaction with pharmacists’ counselling.

| **Counselling Point** | **Number (%)** | |
| --- | --- | --- |
| **Yes** | **No** |
| The pharmacist has educated me about the indication of the medication | 511 (72%) | 199 (28%) |
| The pharmacist has educated me about the use of medication regarding meals | 624 (87.9%) | 86 (12.1%) |
| The pharmacist has educated me about the most appropriate time to take the medication | 572 (80.6%) | 138 (19.4%) |
| The pharmacist has educated me about the duration for the medication use | 486 (68.5%) | 224 (31.5%) |
| The pharmacist has told me about the adverse drug reactions | 294 (41.4%) | 416 (58.6%) |
| The pharmacist has educated me about possible drug or food interactions | 225 (31.7%) | 485 (68.3%) |
| The pharmacist has educated me about the storage conditions for the medication | 285 (40.1%) | 425 (59.9%) |

1. **Patients Counselling about Medical Devices**

**Table A3**: Patients’ satisfaction with pharmacists’ counseling about special devices.

| **Item** | **Number (%)** | | |
| --- | --- | --- | --- |
| **Yes** | **No** | **Not applicable** |
| The pharmacist did not educate me about certain devices (Such as inhalers, pens, nebulizers, and sprays) when I bought it. | 111 (15.6%) | 302 (42.5%) | 297 (41.8%) |

- **Ethical and Professional Considerations**

1. **Patient’s privacy in pharmacy**

**Table A4:** Participants’ perspectives about pharmacists’ respect for patient privacy.

| **Item** | **Number (%)** | |
| --- | --- | --- |
| **Yes** | **No** |
| There is a private area in the community pharmacy I have recently visited | 301 (42.4%) | 409 (57.6%) |
| The pharmacist has discussed sensitive information in front of other people | 93 (13.1%) | 617 (86.9%) |
| The pharmacist has told others private information about me without my permission | 48 (6.8%) | 662 (93.2) |

1. **Patient’s Autonomy**

**Table A5:** Participants’ perspectives about pharmacists’ respect for patient autonomy.

| **Item** | **Number (%)** | |
| --- | --- | --- |
| **Yes** | **No** |
| The pharmacist asked me before dispensing an alternative medication | 569 (80.1%) | 141 (19.9%) |
| The pharmacist asked me before dispensing a medication that was approaching its expiration date | 286 (40.3%) | 424 (59.7%) |

1. **Pharmacist’s Justice with patients**

**Table A6**: Participants’ perspectives toward pharmacists’ justice.

| **Item** | **Number (%)** | |
| --- | --- | --- |
| **Yes** | **No** |
| The pharmacist was just in the time he gave me compared to other patients | 627 (88.3%) | 83 (11.7%) |
| The pharmacist was just by committing to the patients order while dispensing medications | 633 (89.2%) | 77 (10.8%) |
| The pharmacist was just in the way he acts with me compared to others | 634 (89.3%) | 76 (10.7%) |
| The pharmacist was just in the education he gave to me compared to others | 608 (85.6%) | 102 (14.4%) |

- **Patient’s perceptions toward pharmacists’ attitude**

**Table A7**: Patients’ perspectives toward pharmacists’ attitude.

| **Statement** | **Number (%)** | | | | |
| --- | --- | --- | --- | --- | --- |
| **Strongly agree** | **Agree** | **Neutral** | **Disagree** | **Strongly disagree** |
| Pharmacists are health care providers who have detailed information about medications. | 341 (48%) | 270 (38%) | 63 (8.9%) | 10 (1.4%) | 26 (3.7%) |
| Pharmacists are the sellers for the medications, but they do not have enough information about. | 33 (4.6%) | 41 (5.8%) | 77 (10.8%) | 364 (51.3%) | 195 (27.5%) |
| If I have a question about medication, a pharmacist is the right person to ask. | 270 (38%) | 287 (40.4%) | 133 (18.7%) | 16 (2.3%) | 4 (0.6%) |
| Jordanian pharmacists need further training about patient education. | 175 (24.6%) | 165 (23.2%) | 202 (28.5%) | 140 (19.7%) | 28 (3.9%) |
| I trust the information I get from Pharmacists. | 238 (33.5%) | 285 (40.1%) | 123 (17.3%) | 57 (8%) | 7 (1%) |
| The pharmacist counseling helps me to adhere to my medication | 274 (38.6%) | 323 (45.5%) | 96 (13.5%) | 16 (2.3%) | 1 (0.1%) |

- **Inferential Analysis**

**Table A8**: Parameters affecting the normalized research study sections scores (*n*=710).

| **Variable** | | **Satisfaction** | | **Ethical-Professional Considerations** | | **Attitude** | |
| --- | --- | --- | --- | --- | --- | --- | --- |
| **Category** | **Subcategory** | **M ± SD** | ***P-*value** | **M ± SD** | ***P-*value** | **M ± SD** | ***P-*value** |
| Gender | Male | 57.39±25.59 | 0.801 | 75.77±20.98 | 0.074 | 76.87±13.09 | 0.800 |
| Female | 56.92±24.10 | 78.36±15.64 | 76.63±11.27 |
| Age | Less than 32.2 years | 56.54±25.03 | 0.413 | 77.04±17.31 | 0.666 | 75.38±11.89 | <0.001 |
| Equals or more than 32.2 years | 58.12±24.19 | 77.65±17.78 | 79.09±12.01 |
| Geographic Location | North of Jordan | 61.95±23.72 | <0.001 | 79.66±17.99 | 0.078 | 75.21±12.58 | 0.050 |
| Middle of Jordan | 54.63±24.61 | 76.25±17.96 | 77.76±11.67 |
| South of Jordan | 64.11±24.72 | 79.46±18.79 | 74.85±13.21 |
| Educational Level | Less than 12th Grade | 56.24±21.38 | 0.001 | 78.38±15.18 | 0.067 | 81.52±9.87 | 0.001 |
| 12th Grade | 62.67±22.90 | 80.48±16.95 | 78.81±10.31 |
| Diploma | 61.84±23.16 | 79.31±16.26 | 77.52±12.21 |
| Bachelor’s degree | 55.91±24.67 | 76.21±18.93 | 75.53±12.49 |
| Master’s degree or PhD | 48.04±29.79 | 73.72±19.28 | 74.92±12.53 |
| Monthly Income | Less than 650 JD | 57.94±24.81 | 0.126 | 78.69±16.94 | 0.001 | 77.18±11.86 | 0.092 |
| 650 JD or more | 54.37±24.37 | 72.99±20.67 | 75.42±12.59 |
| Pregnancy or Breastfeeding (Females) | Yes | 53.85±26.02 | 0.425 | 79.49±15.82 | 0.473 | 77.52±10.08 | 0.614 |
| No | 57.12±24.67 | 77.36±18.02 | 76.49±12.43 |
| Smoking Status | Yes | 59.76±21.99 | 0.019 | 77.41±19.38 | 0.863 | 75.84±12.68 | 0.118 |
| No | 55.46±26.19 | 77.17±17.28 | 77.29±11.64 |
| Do you work in the medical field (Physician, Dentist, Nurse, Pharmacist, Clinical Pharmacist, or lab technician)?12.67 | Yes | 54.93±27.88 | 0.129 | 75.93±19.99 | 0.178 | 77.25±12.78 | 0.432 |
| No | 58.16±23.03 | 77.89±17.13 | 76.49±11.71 |
| Do you have first degree relatives who work in the medical field? (Physician, Dentist, Nurse, Pharmacist, Clinical Pharmacist or Lab Technician) | Yes | 59.54±24.79 | 0.024 | 77.96±17.09 | 0.367 | 75.78±12.67 | 0.068 |
| No | 55.30±24.55 | 76.74±18.84 | 77.44±11.55 |
| Hypertension | Yes | 58.06±22.44 | 0.676 | 79.94±16.47 | 0.105 | 81.49±11.31 | <0.001 |
| No | 56.96±25.11 | 76.81±18.35 | 75.93±12.01 |
| Diabetes Mellitus | Yes | 60.65±21.03 | 0.095 | 80.31±17.12 | 0.083 | 79.38±12.71 | 0.024 |
| No | 56.59±25.20 | 76.81±17.12 | 76.34±11.93 |
| Cardiovascular Diseases (other than hypertension) | Yes | 54.77±22.89 | 0.554 | 78.68±17.25 | 0.625 | 82.52±9.54 | 0.003 |
| No | 57.24±24.83 | 77.18±18.16 | 76.41±12.11 |
| Thyroid Disorders | Yes | 60.00±22.31 | 0.364 | 78.17±16.27 | 0.694 | 80.48±10.49 | 0.015 |
| No | 56.87±24.92 | 77.18±18.27 | 76.41±12.14 |
| Musculoskeletal Injuries | Yes | 60.74±20.05 | 0.079 | 78.15±16.19 | 0.619 | 82.19±10.60 | <0.001 |
| No | 56.59±25.30 | 77.13±18.38 | 75.94±12.07 |
| Others | Yes | 55.67±25.26 | 0.535 | 78.12±18.25 | 0.615 | 78.42±11.09 | 0.138 |
| No | 57.35±24.65 | 77.13±18.09 | 76.47±12.19 |

M ± SD: Mean ± Standard Deviation, JD: Jordanian Dinar
